# Supplementary material for: Facile synthesis and stable lithium storage performances of Sn- sandwiched nanoparticles as a high capacity anode material for rechargeable Li batteries
Source: Royal Society of Chemistry journal article supplement (doi:10.1039/c0jm00829j), 2010-01-01
Supplement: c0jm00829j.pdf [file c0jm00829j.pdf]

## Supplementary Information

### Facile synthesis and stable lithium storage performances of Sn- sandwiched nanoparticles as a high capacity anode material for rechargeable Li batteries

Zhongxue Chen<sup>a</sup>, Yuliang Cao,<sup>\*ab</sup> Jiangfeng Qian,<sup>a</sup> Xinpeng Ai<sup>a</sup> and Hanxi Yang<sup>\*a</sup>

<sup>a</sup> Hubei Key Lab. of Electrochemical Power Sources, College of Chemistry and Molecular Science,

Wuhan University Wuhan 430072, (P. R. China). Tel: 86-027-68754526;

E-mail: [hxyang@whu.edu.cn](mailto:hxyang@whu.edu.cn)

<sup>b</sup> Pacific Northwest National Laboratory, Richland Washington 99352, USA.

E-mail: [ylcao@whu.edu.cn](mailto:ylcao@whu.edu.cn)

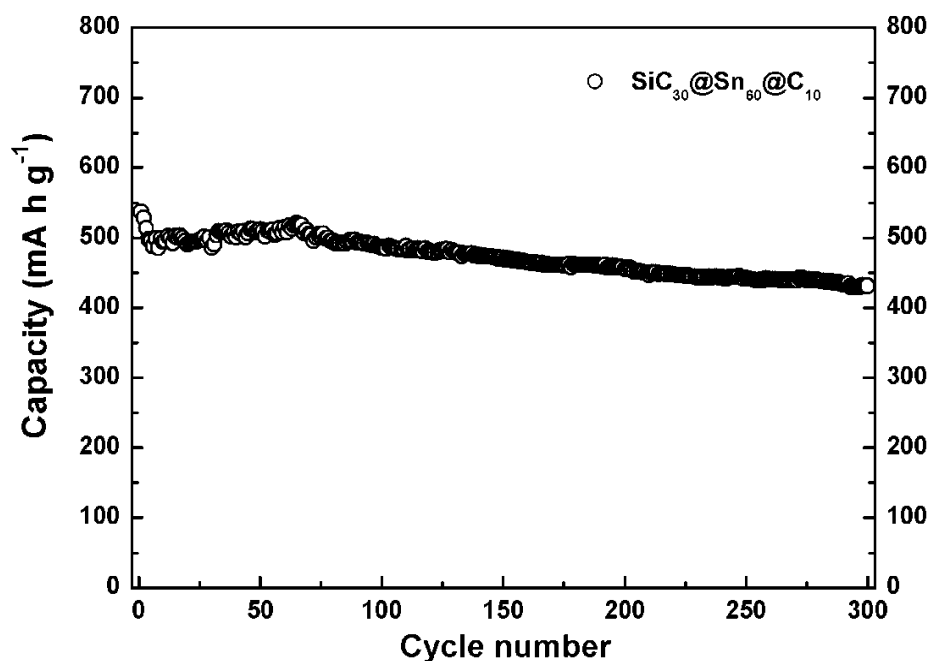

**Fig. S1** Electrochemical cyclic performance of the SiC<sub>30</sub>@Sn<sub>60</sub>@C<sub>10</sub> composite at a constant current of 100 mA g<sup>-1</sup>. The composite exhibits a reversible capacity of 431 mA h g<sup>-1</sup> up to 300 cycles (80.3% of the initial capacity).

**Table S1** Comparison of the electrochemical performance of the Sn composite in this work with those reported in the literatures

| Ref. | Sample                                               | Method                   | Testing voltage window (vs. Li <sup>+</sup> /Li) | Initial coulombic efficiency (%) | Initial reversible capacity | Capacity retention after cycling                   | Capacity attenuation rate (%) |
|------|------------------------------------------------------|--------------------------|--------------------------------------------------|----------------------------------|-----------------------------|----------------------------------------------------|-------------------------------|
|      |                                                      |                          |                                                  |                                  |                             | mA h g <sup>-1</sup>                               |                               |
| Ours | SiC <sub>30</sub> @Sn <sub>60</sub> @C <sub>10</sub> | multiBall milling        | 0.01~1.5V                                        | 50                               | 537                         | 490(100 <sup>th</sup> )<br>431(300 <sup>th</sup> ) | 0.087<br>0.066                |
| [36] | Sn-C                                                 | Sol-gel& calcination     | 0.02~1.5V                                        | ~40                              | 450                         | ~450(100 <sup>th</sup> )                           | 0                             |
| [38] | Sn@C                                                 | Hydrothermal synthesis   | 0.005~2.0 V                                      |                                  | ~620                        | 311(200 <sup>th</sup> )                            | 0.25                          |
| [35] | Sn-C                                                 | Sol-gel& calcination     | 0.01~1.5V                                        | ~70                              | 350                         | ~500(200 <sup>th</sup> )                           | 0                             |
| [44] | Sn@C                                                 | Hydrothermal synthesis   | 0~1.5V                                           | 86                               | 681                         | 664(50 <sup>th</sup> )                             | 0.05                          |
| [45] | Sn@CNT                                               | CVD method               | 0.005~3.0 V                                      | 67.5                             | 716                         | ~250(80 <sup>th</sup> )                            | 0.8                           |
|      | Sn@C@CNT                                             | Solid-state pyrolysis    | 0.01~3.0V                                        | 77.8                             | 526                         | 474(80 <sup>th</sup> )                             | 0.12                          |
| [46] | Sn-Co-C                                              | Ball milling             | 0.01~1.5V                                        | ~64                              | 450                         | 270(100 <sup>th</sup> )                            | 0.4                           |
| [47] | Sn-Co-C                                              | Alloyed mechanically     | 0.005~1.2 V                                      |                                  | ~460                        | ~380(100 <sup>th</sup> )                           | 0.17                          |
| [48] | Sn/C                                                 | Modified Hummer's method | 0~3.0V                                           | 64.8                             | 810                         | 508(100 <sup>th</sup> )                            | 0.37                          |
| [31] | SnCo/CNT                                             | Chemical reduction       | 0.02~1.5V                                        | ~58                              | 506                         | 424(30 <sup>th</sup> )                             | 0.54                          |

## References

- 31 Ke, F. S. L. Huang, H. H. Jiang, H. B. Wei, F. Z. Yang and S. G. Sun, *Electrochem. Commun.*, 2007, **9**, 228.
- 35 G. Derrien, J. Hassoun, S. Panero and B. Scrosati, *Adv. Mater.*, 2007, **19**, 2336.
- 36 J. Hassoun, G. Derrien, S. Panero and B. Scrosati, *Adv. Mater.*, 2008, **20**, 3169.
- 38 D. Deng and J. Y. Lee, *Angew. Chem. Int. Ed.*, 2009, **48**, 1660.
- 44 M. J. Noh, Y. J. Kwon, H. J. Lee, J. Cho, Y. J. Kim and M. G. Kim, *Chem. Mater.*, 2005, **17**, 1926.
- 45 Y. Wang, M. H. Wu, Z. Jiao and J. Y. Lee, *Chem. Mater.* 2009, **21**, 3210.
- 46 J. Hassoun, G. Mulas, S. Panero and B. Scrosati, *Electrochem. Commun.* 2007, **9**, 2075.
- 47 P. P. Ferguson, M. L. Martine, R. A. Dunlap and J. R. Dahn, *Electrochim. Acta* 2009, **54**, 4534.

48 G. X. Wang, B. Wang, X. L. Wang, J. S. Park, S. X. Dou, H. J. Ahnb and K. W. Kim, *J.*

*Mater. Chem.* 2009, **19**, 8378.
